# 1 Integrative cross tissue analysis of gene expression identifies 2 novel type 2 diabetes genes

3 Jason M. Torres<sup>1</sup>, Alvaro N. Barbeira<sup>2</sup>, Rodrigo Bonazzola<sup>2</sup>, Andrew P. Morris<sup>3</sup>, Kaanan P. Shah<sup>2</sup>,  
4 Heather E. Wheeler<sup>4</sup>, Graeme I. Bell<sup>5,6</sup>, Nancy J. Cox<sup>7,\*</sup>, Hae Kyung Im<sup>2,\*</sup>

5 **1** Committee on Molecular Metabolism and Nutrition, Biological Sciences Division, The University of  
6 Chicago, Chicago, IL, USA

7 **2** Section of Genetic Medicine, Department of Medicine, The University of Chicago, Chicago, IL, USA

8 **3** Institute of Translational Medicine, University of Liverpool, Liverpool, United Kingdom

9 **4** Departments of Biology and Computer Science, Loyola University Chicago, Chicago, IL, USA

10 **5** Department of Medicine, The University of Chicago, Chicago, IL, USA

11 **6** Department of Human Genetics, The University of Chicago, Chicago, IL, USA

12 **7** Division of Genetic Medicine, Vanderbilt University, Nashville, TN, USA

13 \* Correspondence to: [nancy.j.cox@vanderbilt.edu](mailto:nancy.j.cox@vanderbilt.edu) and [haky@uchicago.edu](mailto:haky@uchicago.edu)

## 14 Abstract

15 To understand the mechanistic underpinnings of type 2 diabetes (T2D) loci mapped through GWAS, we  
16 performed a tissue-specific gene association study in a cohort of over 100K individuals ( $n_{\text{cases}} \approx 26\text{K}$ ,  
17  $n_{\text{controls}} \approx 84\text{K}$ ) across 44 human tissues using MetaXcan, a summary statistics extension of PrediXcan.  
18 We found that 90 genes significantly ( $\text{FDR} < 0.05$ ) associated with T2D, of which 24 are previously  
19 reported T2D genes, 29 are novel in established T2D loci, and 37 are novel genes in novel loci. Of these,  
20 13 reported genes, 15 novel genes in known loci, and 6 genes in novel loci replicated ( $\text{FDR}_{\text{rep}} < 0.05$ ) in an  
21 independent study ( $n_{\text{cases}} \approx 10\text{K}$ ,  $n_{\text{controls}} \approx 62\text{K}$ ). We also found enrichment of significant associations  
22 in expected tissues such as liver, pancreas, adipose, and muscle but also in tibial nerve, fibroblasts, and  
23 breast. Finally, we found that monogenic diabetes genes are enriched in T2D genes from our analysis  
24 suggesting that moderate alterations in monogenic (severe) diabetes genes may promote milder and later  
25 onset type 2 diabetes.

## 26 Introduction

27 Type 2 diabetes (T2D) is a complex disease characterized by impaired glucose homeostasis resulting from  
28 dysfunction in insulin-secreting pancreatic islets and decreased insulin sensitivity in peripheral tissues  
29 [1]. In addition to environmental factors such as a sedentary lifestyle and poor diet, genetic susceptibility  
30 is an important contributor to the development of T2D [2]. Genome-wide association studies (GWAS)  
31 have uncovered more than 100 loci that significantly associate with either T2D or glucose-related traits  
32 [3, 4, 2]. However, the majority of single nucleotide polymorphisms (SNPs) significantly associated with  
33 T2D reside in intronic and intergenic regions rather than protein-encoding regions [5, 6]. The results from  
34 GWAS suggest an important role for genetic variation that regulates gene expression rather than altering  
35 codon sequence [7] and have motivated efforts to map the regulatory landscape of the genome [8, 9, 10].  
36 Indeed, sets of trait-associated SNPs are enriched for variants that associate with gene expression (i.e.  
37 expression quantitative trait loci or eQTLs) [11] and that occupy DNase hypersensitivity sites (DHS) [12]  
38 - regions overrepresented for eQTLs *per se* [13]. Moreover, DHS explain a disproportionately high share  
39 of SNP heritability [14] across 11 complex traits [15] and eQTLs mapped in insulin-responsive peripheral  
40 tissues similarly “concentrate” SNP heritability estimates for T2D [16].

41 Recent efforts to elucidate the functional consequences of non-coding disease-associated variants have  
42 challenged the assumption that the nearest gene to an associated marker is the relevant disease gene. For  
43 example, a non-coding SNP (rs12740374) within *CELSR2* at the 1p13 locus associated with myocardial  
44 infarction (MI) and low-density lipoprotein cholesterol (LDL-C) creates a C/EBP transcription factor  
45 binding site and alters the expression of *SORT1* (located  $\approx$  35 kb downstream of rs12740374) in primary  
46 human hepatocytes [17]. Moreover, *Sort1* knockdown and overexpression studies in mice altered LDL-C  
47 and very low density lipoprotein (VLDL) levels [17]. In a study of the *FTO* locus harboring the strongest  
48 association with obesity, researchers observed a long-range interaction between the associated intronic  
49 region of *FTO* and the promoter of *IRX3*, a downstream transcription factor located  $\approx$  500 kb away,  
50 but not with the *FTO* promoter [18]. Perturbing *IRX3* expression in the hypothalamus also reduced  
51 body mass accumulation in the background of a high fat diet and improved measures of metabolic health  
52 [18]. Obesity-associated SNPs within the locus were also significantly associated with *IRX3* expression  
53 in human cerebellum but not with *FTO* expression [18]. These examples demonstrate that regulatory  
54 consequences of disease-associated variants may not solely target the putative causal gene reported from

55 GWAS, if at all. Thus, it is unclear to what extent regulatory genetic variation supports the putative  
56 causal gene at disease-associated loci. We sought to address this problem systematically by applying  
57 a statistical method that leverages the wealth of genotype and expression data from large-scale eQTL  
58 mapping studies.

59 Experimental techniques that manipulate endogenous gene expression (e.g. gene silencing, conditional  
60 knockout) can delineate relevant disease genes but are generally not suitable for *in vivo* human studies  
61 [19, 20]. By testing for association between the *genetic component* of gene expression and disease,  
62 we exploit the fact that nature essentially perturbs gene expression through random genetic variation  
63 introduced during meiosis. This analytic approach - implemented in the program PrediXcan - allows  
64 for a gene-based test that reflects the mechanism of transcription and presents advantages over GWAS  
65 and other study designs [21]. Namely, it reduces the multiple-testing burden, obviates causality issues  
66 encountered in differential gene expression studies, provides direction of effect for associated genes, and  
67 may implicate disease-relevant tissues [21]. Moreover, PrediXcan can corroborate reported disease genes  
68 as well as implicate novel genes as was the case for an analysis of type 1 diabetes based on predictors of  
69 gene expression in whole blood tissue [21]. In the present study, we applied a recent adaptation of the  
70 PrediXcan method - MetaXcan - that inputs summary GWAS data (Barbeira et al. 2016) to perform a  
71 systematic *in silico* evaluation of gene-level associations at T2D loci [22, 21]. We applied MetaXcan using  
72 predictive models corresponding to more than 40 human tissues to summary data from a trans-ethnic  
73 GWAS meta-analysis representing over 100K individuals and replicated results in an independent cohort.

## 74 Results

### 75 **Genome-wide and cross-tissue scan of gene associations corroborates known** 76 **T2D genes and implicates novel ones**

77 We compared genetically regulated expression levels in T2D cases and controls from a trans-ethnic meta-  
78 analysis of GWAS ( $n_{\text{cases}} = 26,488$  and  $n_{\text{controls}} = 83,964$  from European, East Asian, South Asian,  
79 and Mexican American origin [23]) across 44 human tissues using reference transcriptome data. The  
80 differential expression of the genetic component was inferred using MetaXcan [22] with gene expression  
81 prediction models trained in RNAseq data from the Genotype-Tissue Expression Project (GTEx) [9]. We  
82 included an additional set of predictors trained in whole blood from the Depression Genes and Networks

83 study where the available sample size ( $n = 922$ ) is greater than that currently available for whole blood  
84 from GTEx ( $n = 338$ ) [10].

85 Figure 1 shows a Manhattan plot of the full set of results across all genes and tissues (A) and qq-plots  
86 of the full set (B), the subset of genes within 1Mb of known T2D loci (C), and genes outside of known  
87 loci (D). Most of the significant genes are located in the vicinity of known T2D regions. After adjusting  
88 for the number of tests performed across all 44 tissue models (204,981 tests), we found 49 significant  
89 associations corresponding to 20 genes at the stringent Bonferroni threshold ( $p < 2.4 \times 10^{-7}$ ) (See Table  
90 1 and Supplementary Table S1). Of these 20 genes, 12 corresponded to those previously reported (nearest  
91 to the top T2D-associated SNP), 5 were novel but in the vicinity of known loci, and 3 were completely  
92 novel. When using  $FDR < 0.05$ , 90 genes were significantly associated with T2D risk; 22 of them were  
93 previously reported T2D genes, 31 were novel genes in established T2D loci, and 37 were novel genes in  
94 novel loci. (See Supplementary Table S2)

95 The strongest gene association corresponds to *TCF7L2* - the gene harboring the strongest SNP-level  
96 association with T2D - and provides corroborating evidence that *TCF7L2* is the effector gene regulated  
97 by the non-coding variant driving the GWAS signal (Table S1 and Figure 1). This analysis provides  
98 additional *in silico* support for established T2D genes including *JAZF1*, *HHEX*, *WFS1*, *IGF2BP2*, and  
99 *CAMK1D*.

#### 100 **Significant genes beyond known T2D loci: novel loci**

101 Although most MetaXcan-implicated genes mapped to within 1 Mb of T2D-associated SNPs from the  
102 trans-ethnic meta-analysis of GWAS ( $p < 5 \times 10^{-6}$ ), there were a few located beyond these intervals and  
103 hence designated as *genes in novel T2D loci*. Two associations met the stringent Bonferroni-corrected sig-  
104 nificance: *ANKRD20A1* and *CWF19L1* in breast mammary tissue (Table S1). Of the 90 genes implicated  
105 by associations at  $FDR \leq 0.05$ , 37 mapped to *novel T2D loci* and included genes encoding potassium  
106 ion transporters (*KCNK17* and *KCNK7*) and zinc-finger proteins (*ZNF703*, *ZNF34*, and *ZNF771*) (Sup-  
107 plementary Table S3). Other *novel T2D loci* genes that were supported by two or more tissue-level  
108 associations include *MEIS1*, *JUND*, *MRPS33*, *TCP11L1*, *VIPAS39*, and *SNX11* (Supplementary Table  
109 S3). Collectively, these genes represent a class of discoveries that would have evaded detection in GWAS  
110 not only due to their distal location relative to significantly-associated marker SNPs but also due to  
111 proximal marker SNPs not meeting traditional genome-wide significance used for GWAS studies.

| type         | gene      | chrom | reported.genes                       | disc.pval | gera.pval | gera.qval | meta.pval |
|--------------|-----------|-------|--------------------------------------|-----------|-----------|-----------|-----------|
| T2D.Gene     | AP3S2     | 15    | AP3S2,PRC1,VPS33B                    | 1.90E-07  | 4.60E-04  | 9.33E-04  | 2.20E-10  |
| T2D.Gene     | CAMK1D    | 10    | CDC123,CAMK1D                        | 2.40E-09  | 6.60E-04  | 1.16E-03  | 2.90E-10  |
| T2D.Gene     | CCNE2     | 8     | DPY19L4,INTS8,CCNE2,TP53INP1,NDUFAF6 | 3.00E-08  | 0.31      | 1.95E-01  | 3.00E-06  |
| T2D.Gene     | HHEX      | 10    | IDE,KIF11,HHEX                       | 5.90E-12  | 1.30E-04  | 5.17E-04  | 1.20E-12  |
| T2D.Gene     | HMG20A    | 15    | PEAK1,HMG20A,LINGO1                  | 4.50E-08  | 6.50E-04  | 1.16E-03  | 6.70E-10  |
| T2D.Gene     | IGF2BP2   | 3     | C3orf65,IGF2BP2                      | 8.60E-14  | 4.80E-09  | 1.01E-07  | 1.10E-18  |
| T2D.Gene     | JAZF1     | 7     | JAZF1                                | 2.50E-17  | 2.40E-08  | 3.66E-07  | 5.90E-21  |
| T2D.Gene     | NCR3LG1   | 11    | NCR3LG1,KCNJ11,ABCC8                 | 1.50E-08  | 8.40E-05  | 4.52E-04  | 1.30E-10  |
| T2D.Gene     | TCF7L2    | 10    | TCF7L2                               | 2.50E-21  | 8.70E-19  | 7.95E-17  | 2.00E-31  |
| T2D.Gene     | TP53INP1  | 8     | DPY19L4,INTS8,CCNE2,TP53INP1,NDUFAF6 | 6.90E-08  | 0.57      | 3.12E-01  | 5.10E-06  |
| T2D.Gene     | WFS1      | 4     | WFS1,PPP2R2C                         | 1.10E-08  | 4.70E-06  | 3.07E-05  | 4.30E-11  |
| Known.Region | CDKN2A    | 9     | CDKN2B,DMRTA1                        | 1.10E-08  | 0.003     | 3.61E-03  | 4.50E-10  |
| Known.Region | CYP26C1   | 10    | IDE,KIF11,HHEX                       | 1.50E-10  | 0.0053    | 5.84E-03  | 9.30E-10  |
| Known.Region | DCLRE1A   | 10    | TCF7L2                               | 1.10E-13  | 4.70E-07  | 4.77E-06  | 4.90E-17  |
| Known.Region | HLA-A     | 6     | POUF5F1,TCF19                        | 5.10E-08  | 0.5       | 2.80E-01  | 7.50E-06  |
| Known.Region | ID4       | 6     | CDKAL1                               | 6.30E-10  | 2.40E-06  | 1.69E-05  | 2.10E-15  |
| Known.Region | NUDT5     | 10    | CDC123,CAMK1D                        | 1.10E-08  | 4.90E-04  | 9.33E-04  | 2.00E-09  |
| Known.Region | RCCD1     | 15    | AP3S2,PRC1,VPS33B                    | 1.40E-08  | 0.0018    | 2.53E-03  | 5.70E-10  |
| Known.Region | RCCD1     | 15    | AP3S2,PRC1,VPS33B                    | 1.40E-08  | 0.0012    | 1.92E-03  | 6.10E-10  |
| Unknown      | ANKRD20A1 | 9     | none reported                        | 4.40E-08  | 0.36      | 2.18E-01  | 1.90E-06  |
| Unknown      | CWF19L1   | 10    | none reported                        | 4.60E-08  | 0.45      | 2.56E-01  | 2.90E-06  |

**Table 1. Significant association between predicted expression and T2D.** Bonferroni corrected for all gene tissue pairs tested. When multiple tissues were significant, the top tissue result is shown.

## 112 Significant genes enriched in relevant pathways

113 To glean insight into relevant biological pathways, we performed a gene set enrichment analysis on the set  
 114 of  $FDR \leq 0.05$  significant genes and found top Gene Ontology Biological Process (GO:BP) pathways to  
 115 involve the insulin-secretory pancreatic  $\beta$ -cell (e.g. negative regulation of type B pancreatic cell apoptotic  
 116 process, Supplemental Figure S4). This was also the case when we restricted this analysis to the set of  
 117 *reported* T2D genes (Supplemental Table S5). However, we found fatty acid homeostasis to be a top  
 118 pathway enriched among the set of *novel* T2D genes implicated in our MetaXcan analysis, underscoring  
 119 a genetic contribution from variants regulating gene expression in insulin-responsive peripheral tissues  
 120 (Supplemental Table S6).

## 121 Enrichment of genes reported for related traits

122 We also explored shared etiology with other complex diseases by comparing our set of MetaXcan-  
 123 implicated T2D genes with sets of genes implicated by GWAS listed in the NHGRI-EBI online catalogue.  
 124 Unsurprisingly, we found that the set of MetaXcan-significant genes nearest to associated SNPs from the  
 125 trans-ethnic study (i.e. *reported* T2D genes) were enriched among gene sets annotated to type 2 diabetes  
 126 ( $p = 0.0001$ ), fasting glucose-related traits with BMI interaction ( $p = 0.001$ ), two-hour glucose challenge

127 ( $p = 0.007$ ), and glycated hemoglobin levels ( $p = 0.028$ ) (Supplementary Table S7). However, an analysis  
128 based on the set of *novel* T2D genes (i.e. genes distal to associated SNPs from the trans-ethnic study  
129 at  $p < 5 \times 10^{-6}$ ) revealed an enrichment for epilepsy ( $p = 0.0001$ ) attributable to *novel* genes *COPZ2*,  
130 *SNX11*, and *MAST4* (Supplementary Table S8). Similarly, *novel* T2D genes *CCDC92*, *HOXA11*, *MEIS1*,  
131 and *JUND* were responsible for an observed enrichment for BMI-adjusted waist-to-hip ratio ( $p = 0.0004$ ).  
132 *HKDC1* is a *novel* T2D gene implicated by our MetaXcan analysis that has been previously implicated  
133 in pregnancy-related glycemic traits and is the driver of the observed enrichment for this phenotype  
134 ( $p = 0.044$ ) (Supplemental Table S8).

### 135 **Replication of novel T2D genes in independent GERA study**

136 For the replication, we used 9,747 T2D cases and 61,857 controls from the Resource for Genetic Epidemi-  
137 ology Research on Adult Health and Aging study (GERA, phs000674.v1.p1). This independent dataset  
138 arises from a collaboration between the Kaiser Permanente Research Program on Genes, Environment,  
139 and Health and the UCSF Institute for Human Genetics represents a multi-ethnic cohort of 100K<sup>+</sup> in-  
140 dividuals from Northern California with available electronic medical records (EMRs). We performed  
141 MetaXcan analyses using GWAS results [24] and the same 44 human tissue expression models as in the  
142 discovery analysis.

143 Of the 90 top genes chosen for replication (discovery FDR < 0.05), 34 replicated ( $p < 0.05$ ); 13  
144 were previously reported genes, 15 were novel genes in known loci, and 6 were novel genes in novel loci.  
145 Moreover, the direction of effect was consistent across replicated associations (Figure 2).

146 Interestingly, decreased expression of *HKDC1* in aortic artery ( $p = 0.024$ ) replicated in GERA.  
147 We observed replication for increased expression of *C2* in subcutaneous adipose tissue ( $p = 4.9 \times 10^{-4}$ ),  
148 *HOXA11* in sigmoid colon ( $p = 0.0016$ ), and *CYP21A2* in visceral (omentum) adipose tissue ( $p = 0.046$ ).  
149 The remaining set of *novel* genes replicated at regions spanning T2D-associated loci (i.e. T2D windows)  
150 include *EVC*, *ID4*, *EXT1*, *NUDT5*, *CYP26C1*, *DCLRE1A*, *GPAM*, *NHLRC2*, *RCN2*, and *CTD-2021H9.3*  
151 (Supplementary Table S9).

152 Among reported genes that replicated in GERA are *JAZF1*, *HHEX*, *WFS1*, *CAMK1D*, *NCR3LG1*,  
153 *AP3S2*, *HMG20A*, *CDKN2A*, *KCNJ11*, *IRS1*, and *IGF2BP2* (Table S1)

154 Five genes outside of known T2D regions replicated in GERA. These include *KCNK17* (potassium  
155 two pore domain channel subfamily K member 17), two zinc finger protein encoding genes, *ZNF703* (zinc

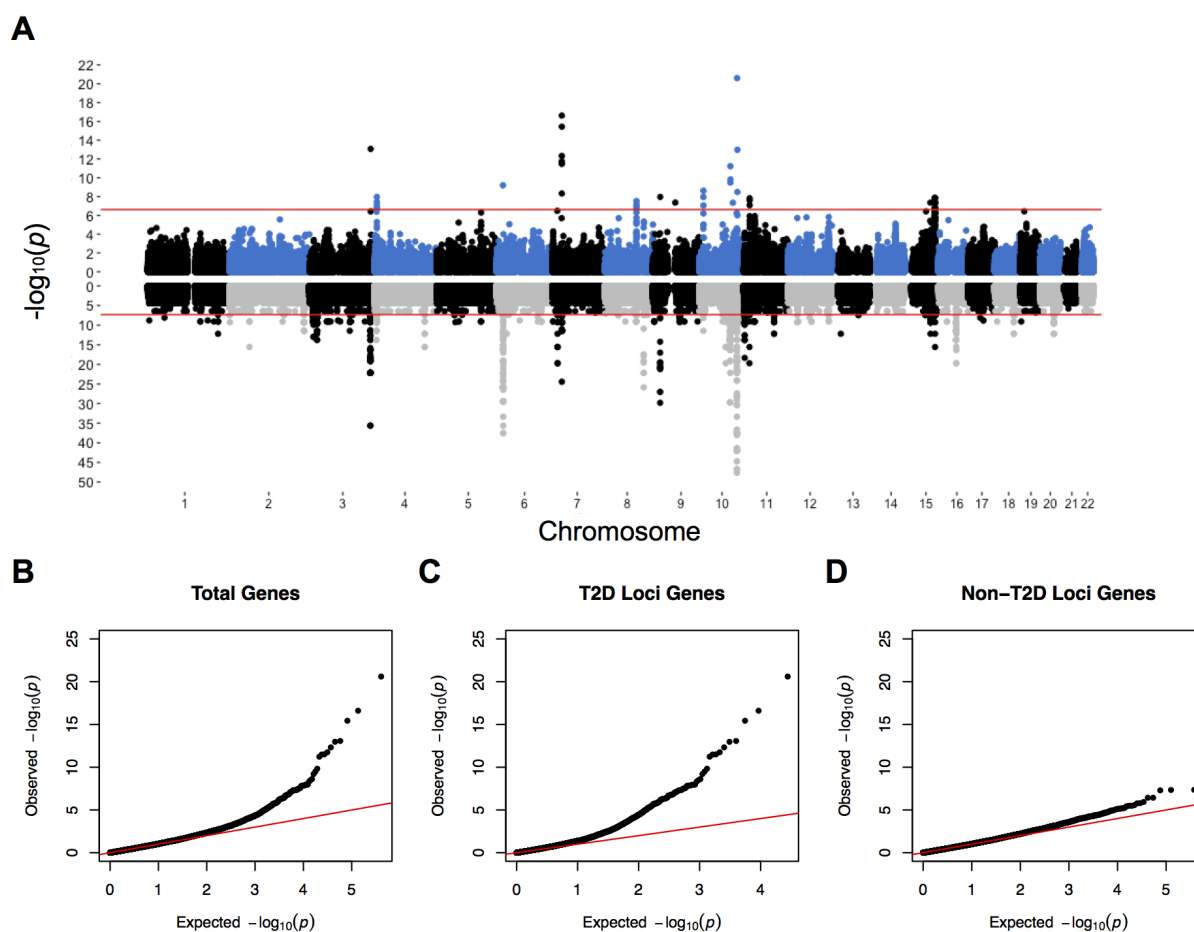

**Figure 1. Tissue-level predicted gene expression associations map to predominantly known T2D loci.** (A) (*Upper*) Manhattan plot showing MetaXcan gene associations across 44 tissue models using summary statistics from a trans-ethnic meta-analysis [23]. Red line denotes the Bonferroni significance threshold adjusted for the total number of tests performed across all tissue models ( $p < 2.4 \times 10^{-7}$ ). Positions correspond to transcription start sites. (*Lower*) Manhattan plot showing SNP associations from the trans-ethnic meta-analysis of GWAS. Red line denotes marginal significance threshold ( $p = 5 \times 10^{-6}$ ). Y-axis is truncated at  $-\log_{10}(p) = 50$  to enable comparison with MetaXcan profile as chromosome 10 association at *TCF7L2* locus would dominate plot. QQ-plot of tissue-level associations across 44 models for (B) total genes, (C) genes within 1 Mb of GWAS associations ( $p < 5 \times 10^{-6}$ ), and (D) genes greater than 1 Mb away from GWAS associations.

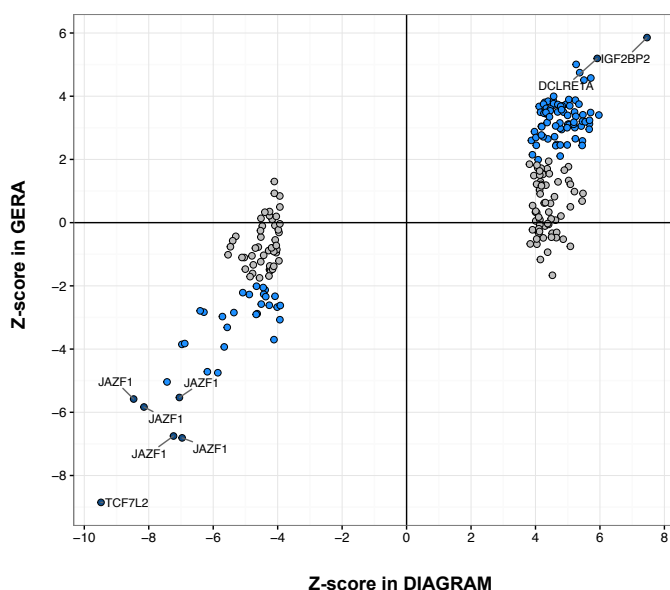

**Figure 2. Replication of tissue-level gene associations in the GERA study.** 106 of 207 tissue-level gene associations at  $FDR \leq 0.05$  from the MetaXcan analysis of the trans-ethnic study meet the  $p < 0.05$  threshold in the MetaXcan analysis of the GERA T2D study (blue). Gene associations meeting Bonferroni significance in GERA are labeled. All replicated associations show consistent direction of effect between studies.

156 finger protein 703) and *ZNF771* (zinc finger protein 771), *PXMP2* (peroxisomal membrane protein 2)  
157 and *PPIB* (peptidylprolyl isomerase B)(Supplementary Table S3).

## 158 Enrichment in diabetes relevant tissues

159 We sought to investigate the role of different tissues in the pathogenesis of T2D by looking at the  
160 enrichment of significant associations in each tissue. We used the average significance (represented by  
161 the squared  $Z$ -score averaged across all genes) as a measure of enrichment but recognized the need to  
162 account for differential power to detect associations given the different sample sizes used in the training of  
163 different tissue models. The enrichment increases as sample size increases (Spearman's rank correlation  
164  $\rho = 0.887$ ,  $p = 4.69 \times 10^{-16}$ ) (Figure 3). As expected, we found liver, pancreas, subcutaneous adipose  
165 tissue, and skeletal muscle ranked higher than other tissues with similar sample size.

166 However, when we examined individual genes, many of established T2D genes (e.g. *TCF7L2*, *WFS1*,  
167 *IRS1*) show associations in tissues that are not traditionally considered relevant for diabetes. For example,  
168 *KCNJ11*, which encodes a potassium ion transporter in pancreatic islet  $\beta$ -cells and plays an integral role in



169 glucose-stimulated insulin secretion [25], was significantly associated in esophagus, skin, and whole blood  
170 whereas *TCF7L2* association was only detected in aortic artery. *WFS1*, known to cause a syndromic  
171 form of diabetes, was significantly associated with T2D in multiple tissues but none of the top tissues  
172 (skin, tibial nerve, and thyroid) are among diabetes-relevant ones.

173 Among the top 20 genes (stringent Bonferroni significant) only three (*RCCD1*, *CWF19L1*, and  
174 *AP3S2*) show significance across many tissues. For the majority of genes, the association is only de-  
175 tected in a handful of tissues (Figure 3 B). This is probably a consequence of the context specificity of  
176 regulatory mechanisms that lead to disease in the pathogenic tissue. However, because of sharing of reg-  
177 ulatory mechanisms across tissues and because we are examining a large number of tissues, i.e. multiple  
178 experiments, we are able to detect the relevant regulatory mechanism, which may or may not be the  
179 causal tissue, but happened to have the right environmental or context trigger.

180 Given the complexity of gene regulation such as context specificity, feedback loops, as well as hidden  
181 confounders in the expression data, the regulatory activity may not always be detected in the tissue most  
182 relevant to the pathobiology of an implicated gene. But because of sharing of regulation across tissues  
183 [9], an agnostic scanning of multiple tissues provides us with additional windows of opportunity to detect  
184 the relevant regulatory activity.

## 185 **Monogenic diabetes genes enriched in T2D associations**

186 Next we asked if the modest changes in the expression of genes involved in monogenic forms of diabetes  
187 could affect the risk of T2D. For this purpose, we examined the enrichment of significant MetaXcan  
188 associations among genes involved in monogenic forms of diabetes from [26]. Figure 4 shows the qq-plot  
189 for the full set of genes in black, the 81 monogenic diabetes related genes in blue, the smaller list of 28  
190 monogenic genes for which T2D was the primary phenotype. Interestingly, monogenic diabetes related  
191 genes (blue) are more significantly associated than others (further away from the gray identity line) and  
192 the enrichment increases for genes where diabetes is the primary phenotype (green). Diabetes genes from  
193 ClinVar and OMIM showed enrichments in between the two diabetes gene sets.

194 This result supports the model of a continuum of diabetes phenotypes [27] (from severe to milder  
195 forms) in which rare loss of function variants cause severe forms of diabetes whereas smaller alterations  
196 of the expression levels of the same genes increase the risk of a later-onset T2D.

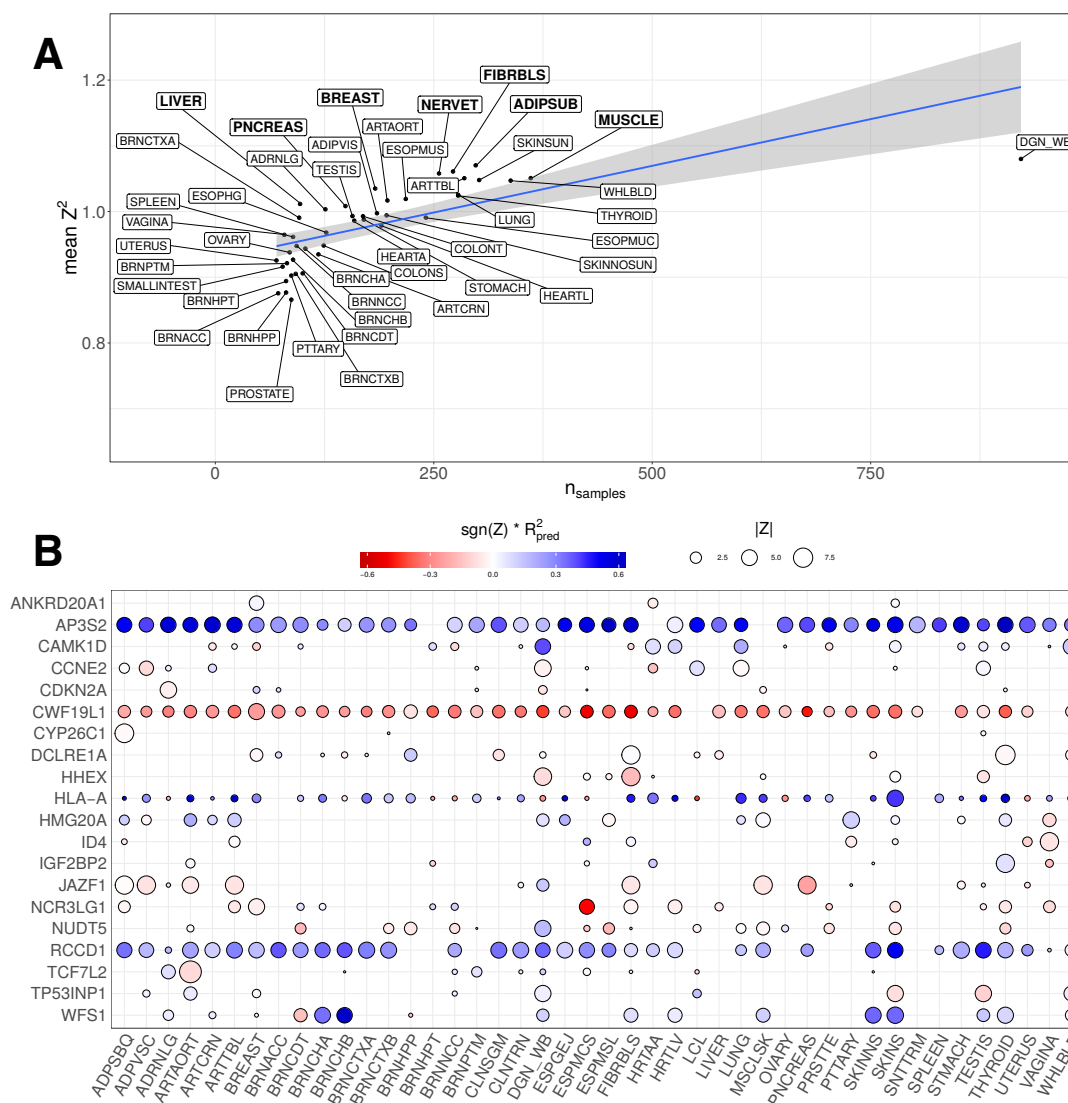

**Figure 3. A. Average enrichment of association results vs sample size.** Average of  $Z_{\text{score}}^2$  across all genes is plotted against the number of samples used for the training of the tissue specific models. The enrichment increases with sample size. Reassuringly, diabetes relevant tissues such as liver, pancreas, adipose, and muscle (highlighted) show up at the top of the tissue list for given sample size. **B. Significance of top T2D-associated genes across tissues.** Z-scores of the association between predicted expression levels and T2D case control status across 44 human tissues is shown. Except for *RCCD1*, *CWF19L1*, and *AP3S2*, genes are associated in only a few tissues indicating context specificity. The size of the circles represent the magnitude of the Z-score. Blue color represents positive association, i.e. increase in expression level associated with increase in T2D risk. Red color represents negative association. The intensity of the color represents the performance of the prediction models (correlation squared between predicted and observed expression levels cross-validated in the training samples). Therefore larger circles indicate more significant associations whereas darker colors indicate higher prediction confidence. Missing circles mean that the association was not performed because of missing model (no good prediction model) or because the prediction SNPs were absent in the GWAS.

**Tissue abbreviations:** Adipose - Subcutaneous (ADPSBQ), Adipose - Visceral (Omentum) (ADPVSC), Adrenal Gland (ADRNLG), Artery - Aorta (ARTAORT), Artery - Coronary (ARTCRN), Artery - Tibial (ARTTBL), Bladder (BLDDER), Brain - Amygdala (BRNAMY), Brain - Anterior cingulate cortex (BA24) (BRNACC), Brain - Caudate (basal ganglia) (BRNCDT), Brain - Cerebellar Hemisphere (BRNCHB), Brain - Cerebellum (BRNCHA), Brain - Cortex (BRNCTXA), Brain - Frontal Cortex (BA9) (BRNCTXB), Brain - Hippocampus (BRNHPP), Brain - Hypothalamus (BRNHPT), Brain - Nucleus accumbens (basal ganglia) (BRNNCC), Brain - Putamen (basal ganglia) (BRNPTM), Brain - Spinal cord (cervical c-1) (BRNSPC), Brain - Substantia nigra (BRNSNG), Breast - Mammary Tissue (BREAST), Cells - EBV-transformed lymphocytes (LCL), Cells - Transformed fibroblasts (FIBRBL), Cervix - Ectocervix (CVXECT), Cervix - Endocervix (CVSEND), Colon - Sigmoid (CLNSGM), Colon - Transverse (CLNTRN), Esophagus - Gastroesophageal Junction (ESGGEJ), Esophagus - Mucosa (ESPMCS), Esophagus - Muscularis (ESPMGL), Fallopian Tube (FLLPNT), Heart - Atrial Appendage (HRTAA), Heart - Left Ventricle (HRTL), Kidney - Cortex (KDNCTX), Liver (LIVER), Lung (LUNG), Minor Salivary Gland (SLVRYG), Muscle - Skeletal (MSCLSK), Nerve - Tibial (NERVET), Ovary (OVARY), Pancreas (PNCREAS), Pituitary (PTTARY), Prostate (PRSTTE), Skin - Not Sun Exposed (Suprapubic) (SKINNS), Skin - Sun Exposed (Lower leg) (SKINS), Small Intestine - Terminal Ileum (SNTTTRM), Spleen (SPLLEN), Stomach (STMACH), Testis (TESTIS), Thyroid (THYROID), Uterus (UTERUS), Vagina (VAGINA), Whole Blood (WHLELD).

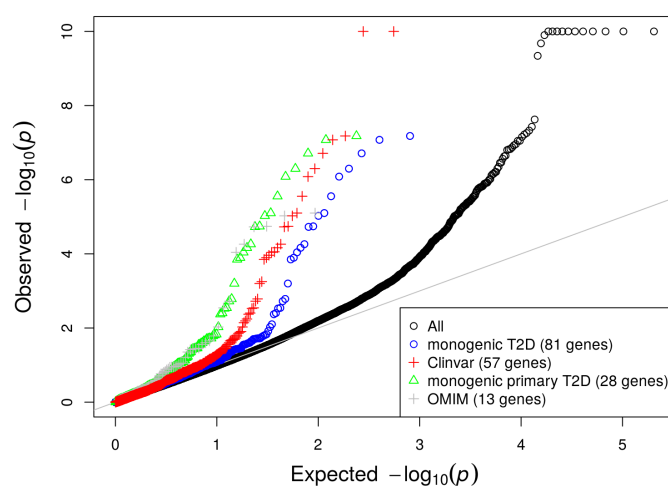

**Figure 4. Enrichment of monogenic diabetes genes among T2D associations.** This figure shows the qqplot of the p-values of the association between predicted expression levels and T2D case status from the trans-ethnic study across 44 human tissues. The black circles denote the full set of results (204,981 gene-tissue pairs). The blue circles correspond to the qqplot of the monogenic diabetes genes from [26]. Green circles correspond to a subset of the monogenic gene list, considered to cause diabetes as the main phenotype. We see that monogenic genes are enriched in significant genes (away from the gray line) and that the subset where the phenotype is diabetes is even more enriched (further away from the gray identity line). OMIM (gray +) and ClinVar (red +) list yield similar enrichments. p-values below  $10^{-10}$  have been capped to  $10^{-10}$  for better visualization.

## 197 **Analysis of known T2D loci prioritizes effector genes**

198 MetaXcan provides a principled way to prioritize effector genes in known trait-associated loci. To imple-  
199 ment this, we defined 68 non-overlapping windows comprising known T2D-associated SNPs (see details  
200 in Methods) which we refer to as T2D-loci. We profiled these loci according to the strength, number,  
201 and proximity of predicted gene expression associations. We used two thresholds for the multiple test  
202 correction: one very stringent that accounts for the total number of tissue/gene pairs (genome-wide  
203  $p = 0.05/204,981 = 2.4 \times 10^{-7}$ ) and another one more appropriate for a locus-specific analysis that  
204 accounts for the total number of tests within the locus (*locus-wide*  $p$  threshold varies by locus).

205 We found that 33 loci had *at least one* locus-wide significant association (Supplementary Table S9).  
206 The significance of the associations are depicted for each of the 33 loci in Supplemental Figures S9  
207 and S10. Nine loci show significance only for the reported gene (*BCL11A*, *IRS1*, *FHIT*, *SLIT3*, *ETV1*,  
208 *STARD10*, *KLHL42*, *C2CD4A*, and the three reported genes at the locus spanning *KCNJ11*, *ABCC8*,  
209 and *NCR3LG1*), 14 show both reported and novel genes, and 9 only show novel genes (Supplementary  
210 Table S9). We next highlight a few loci of interest.

### 211 **JAZF1 locus**

212 At the window comprising T2D-associated SNPs at the *JAZF1* locus, we observed multiple tissue-level  
213 associations for *JAZF1*, the reported T2D gene in this region. *Decreased* expression of *JAZF1* in multiple  
214 tissues (including skeletal muscle, adipose, and pancreas) was associated with T2D (Table S1 and Figure  
215 5A). In addition to *JAZF1*, we find that *increased* expression of *HOXA11*, an upstream transcription  
216 factor-encoding gene, is associated with T2D at the *locus-wide* level (Figure 5A).

217 To gain further insight into these associations, we examined the effect of the SNPs that make up the  
218 prediction models on the phenotype and on the expression of the corresponding gene. We find that many  
219 of the SNPs in the prediction models for *JAZF1* fall within eQTL association peaks in these tissues and  
220 are themselves significantly associated with T2D (Figure 5B-C). Moreover, the disease-promoting alleles  
221 for these SNPs are associated with decreased expression of *JAZF1* (Figure 5B-C). However, the lead SNP  
222 in the *JAZF1* prediction models (rs1635852) is also present in the model for *HOXA11* expression where  
223 the disease-promoting allele associates with increased gene expression (Figure 5B-D).

224 ***CDKAL1* locus**

225 The reported gene, *CDKAL1*, showed no significant association whereas predicted gene expression of  
226 nearby genes *ID4* and *SOX4* associated with T2D (Figure 5E). Although there were multiple eQTL  
227 association peaks evident among the set of SNPs in the prediction models for these genes, there was only  
228 one GWAS peak in this region. Moreover, the disease-promoting alleles of the model SNPs within the  
229 shared peak associated with a decrease in gene expression 5F-G.

230 ***AP3S2*, *PRC1*, and *VPS33B* locus**

231 We observed the most tissue-level gene associations at a region spanning three *reported* T2D genes:  
232 *AP3S2*, *PRC1*, and *VPS33B* (Figure 6A). Although each of these putative T2D genes were supported  
233 by our MetaXcan analysis, the most significant associations at this region corresponded to a *novel* T2D  
234 gene, *RCCD1*, with increased expression of this gene associated with T2D (Figure 6A, Table S1, and  
235 Supplementary Table S9).

236 The only other gene in this interval supported by at least one genome-wide significant association was  
237 the *reported* T2D gene *AP3S2* where increased expression was associated with disease status. Moreover,  
238 increased expression of *AP3S2* in 29 tissue models associated with T2D at the window-level threshold  
239 (Figure 6A and Supplementary Table S9).

240 The variants underlying the top associations for *RCCD1* and *AP3S2* are independent from each  
241 other as the SNPs constituting the respective predictive models are not in linkage disequilibrium with  
242 each other (Figure 6F). The genetically predicted gene expression values for *RCCD1* in brain cortex  
243 and *AP3S2* in small intestine are also uncorrelated (Figure 6B). However, the genetically predicted gene  
244 expression values for the *RCCD1* in brain cortex and *PRC1* in pancreas (the top model for this *reported*  
245 T2D gene), are strongly and negatively correlated with each other, consistent with their directions of  
246 association with T2D (Figure 6A-B). The predictive models underlying these associations share three  
247 SNPs in common (rs2290202, rs2285937, and rs3743445) that are associated with increased expression of  
248 *RCCD1* in brain cortex and decreased expression of *PRC1* in pancreas (Figure 6D-E,G). Therefore, the  
249 top tissue-level gene associations for *RCCD1* and *PRC1* are likely driven by the same regulatory variants  
250 with pleiotropic effects on gene expression.

251 **Strong GWAS signals may act through the regulation of multiple genes**

252 Given the preponderance of loci (21/33) where the predicted expression of multiple adjacent genes as-

253 sociated with T2D (e.g. *RCCD1*, *PRC1*, *VPS33B*, and *UNC45A* at the *PRC1* locus), we hypothesized  
254 that stronger SNP associations from GWAS involve SNPs with pleiotropic effects on gene expression.  
255 Indeed, we observed a correlation between the strength of the top T2D-associated SNP within a genomic  
256 region and the number of MetaXcan-implicated genes (Spearman's  $\rho = 0.43$ ,  $p = 2.8 \times 10^{-4}$ ) (Figure  
257 7A). At the region spanning *TCF7L2*, tissue-level associations implicate 6 genes, including *TCF7L2* it-  
258 self. Decreased expression of *TCF7L2* in aortic artery and increased expression in thyroid associated  
259 with T2D and genome-wide at window-level significance, respectively (Figure 7B). However, we found  
260 that the genetically predicted gene expression values corresponding to all tissue-level gene associations at  
261 window-level significance were correlated with that for *TCF7L2* in aortic artery in directions consistent  
262 with the directions observed in the association plot (Figure 7B-C). Moreover, these tissue-level gene as-  
263 sociations likely share a regulatory genetic basis as SNPs across predictive models fall within with same  
264 GWAS association peak and are in linkage disequilibrium with predictor SNPs for *TCF7L2* in aortic  
265 artery (Figure 7D-G).

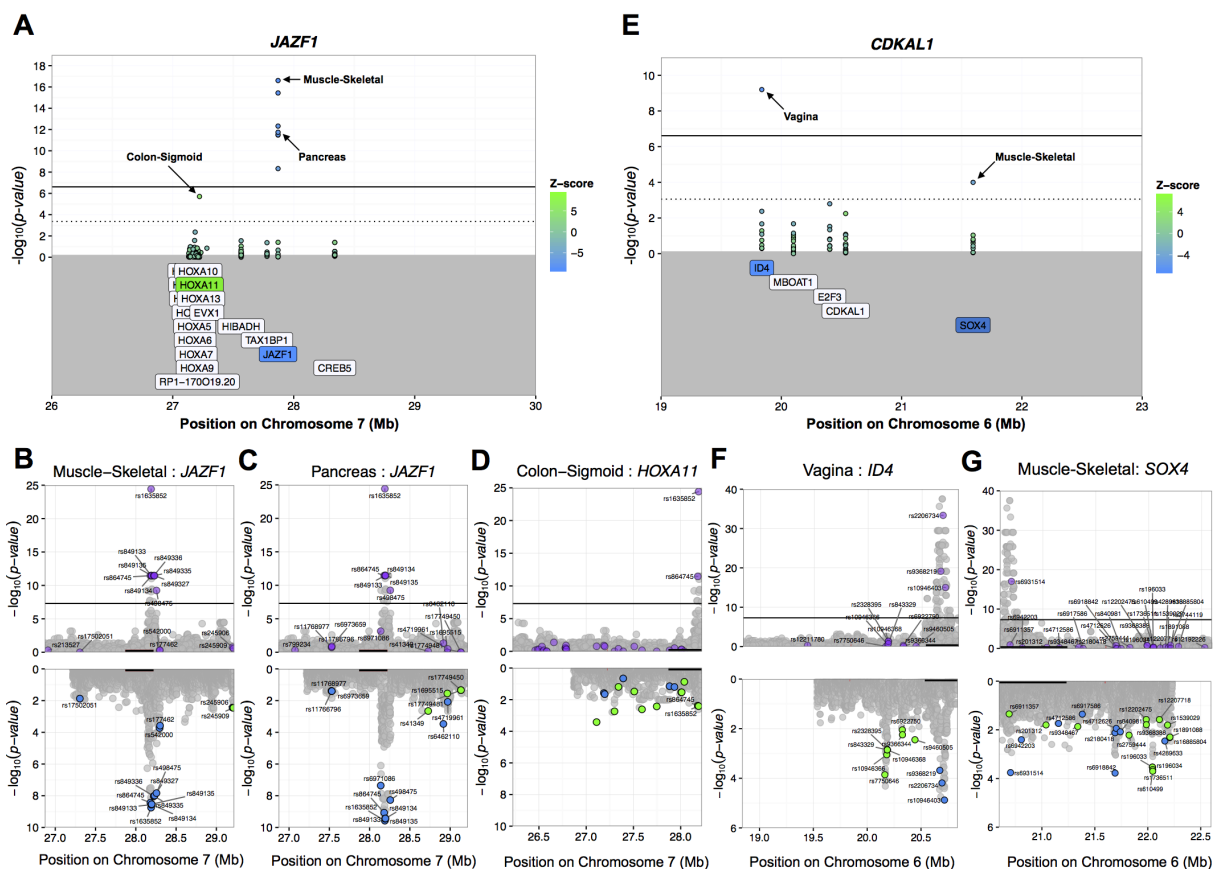

**Figure 5. Predicted gene expression analysis identifies novel gene associations implicating distal genes at T2D loci.** (A) MetaXcan association plot at the *JAZF1* locus. Solid and dotted lines denote Bonferroni (cross-tissue) and locus-level significance thresholds, respectively. Green and blue fill indicate positive and negative direction of associations (i.e. sign of Z-score), respectively. Label shading shows direction for the top tissue-level association for each meeting MetaXcan significance thresholds. Miami plots showing GWAS (*Upper*) and GTEx V6p eQTL (*Lower*) association p-values for SNPs in the gene expression prediction models for (B) *JAZF1* in skeletal muscle, (C) *JAZF1* in pancreas, and (D) *HOXA11* in sigmoid colon. Color in the eQTL plots indicates direction of effect for the disease-promoting allele of each predictor SNP with green and blue denoting positive and negative effects on gene expression, respectively. Black line segment in each plot shows interval spanned by gene start and end sites. *HOXA11* represents a distal novel T2D gene at the *JAZF1* locus that shares two predictor SNPs (rs1635852 and rs864745) with *JAZF1* in the muscle and pancreas models, respectively. (E) MetaXcan association plot at the *CDKAL1* locus. Miami plot of GWAS and eQTL association profiles for the (F) *ID4* in vagina and (G) *SOX4* in skeletal muscle models. Both *ID4* and *SOX4* represent distal novel T2D genes at the *CDKAL1* locus.

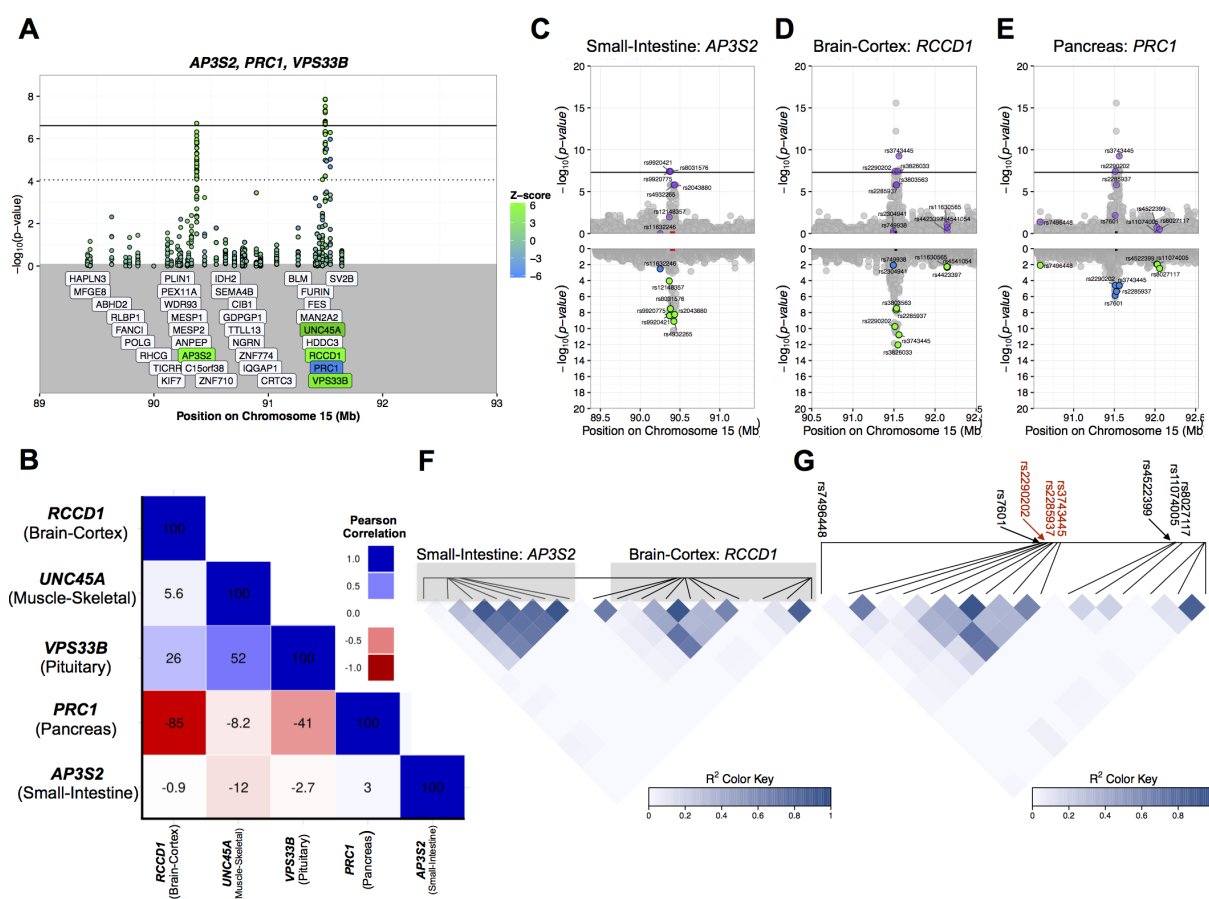

**Figure 6. *RCCD1* shows multiple tissue-level associations at a region spanning three reported T2D genes.** (A) MetaXcan association plot at the region comprising *AP3S2*, *PRC1*, and *VPS33B*. Solid and dotted lines denote Bonferroni (cross-tissue) and locus-level significance thresholds, respectively. Green and blue fill indicate positive and negative direction of associations (i.e. sign of Z-score), respectively. Label shading shows direction for the top tissue-level association for each meeting MetaXcan significance thresholds. (B) Correlation plot of predicted gene expression values in GTEx V6p for the top MetaXcan tissue-level gene associations implicated in the region. Miami plots showing GWAS (*Upper*) and GTEx V6p eQTL (*Lower*) association p-values for SNPs in the gene expression prediction models for (C) *AP3S2* in small intestine, (D) *RCCD1* in brain cortex, and (E) *PRC1* in pancreas. Color in the eQTL plots indicates direction of effect for the disease-promoting allele of each predictor SNP with green and blue denoting positive and negative effects on gene expression, respectively. Black and red line segments in each plot shows interval spanned by *PRC1* and each predicted gene, respectively. (F) LD heatmap of the full set of predictor SNPs in the *AP3S2* (small intestine) and *RCCD1* (brain cortex) models. (G) LD heatmap of the full set of predictor SNPs in the *PRC1* (pancreas) and *RCCD1* (brain cortex) models. All *PRC1* model SNPs are labeled with red color denoted SNPs shared between the two models. *RCCD1* represents a novel gene association with uncorrelated predicted gene expression with *AP3S2* (small intestine) but highly correlated with *PRC1* (pancreas) predicted expression.



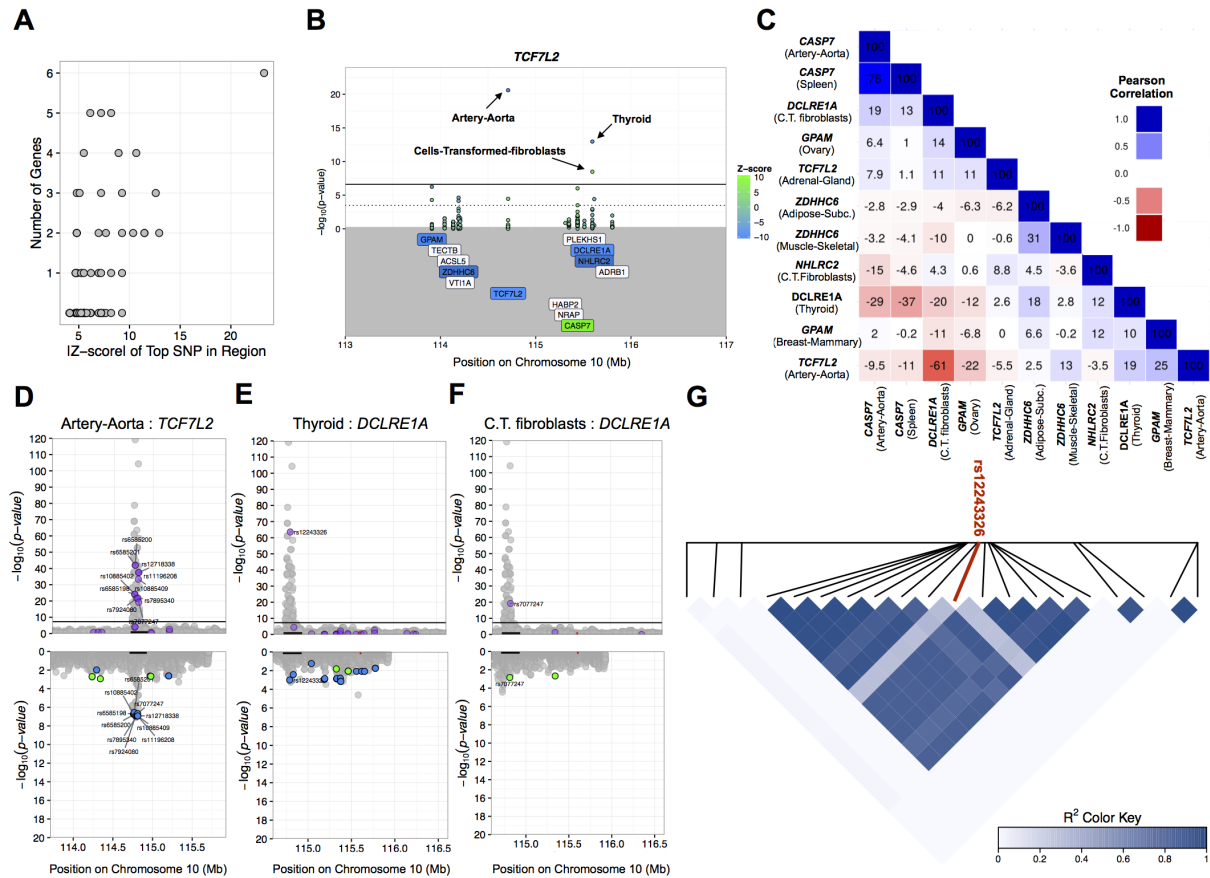

**Figure 7. Locus analysis identifies multiple correlated gene associations at the *TCF7L2* locus.** (A) Absolute value of Z-score for the top T2D-associated SNP in each non-overlapping region is shown against the number of genes implicated by MetaXcan in each region ( $p \leq$  locus threshold). (B) MetaXcan association plot at the *TCF7L2* locus. Solid and dotted lines denote Bonferroni (cross-tissue) and locus-level significance thresholds, respectively. Green and blue fill indicate positive and negative direction of associations (i.e. sign of Z-score), respectively. Label shading shows direction for the top tissue-level association for each meeting MetaXcan significance thresholds. Tissue models are indicated for each of the three gene associations meeting the cross-tissue, genome-wide Bonferroni threshold. (C) Correlation plot of predicted gene expression values in GTEx V6p for the MetaXcan tissue-level gene associations meeting locus-level significance in the region. Miami plots showing GWAS (*Upper*) and GTEx V6p eQTL (*Lower*) association p-values for SNPs in the gene expression prediction models for (C) *TCF7L2* in aortic artery, (D) *DCLRE1A* in thyroid, and (E) *DCLRE1A* in transformed fibroblast cell lines. Color in the eQTL plots indicates direction of effect for the disease-promoting allele of each predictor SNP with green and blue denoting positive and negative effects on gene expression, respectively. Black and red line segments in each plot shows interval spanned by *TCF7L2* and *DCLRE1A*, respectively. (G) LD heatmap of prediction model SNPs for *TCF7L2* (aortic artery) and top SNP in prediction model for *DCLRE1A* in thyroid (red), rs12243326.

## 266 Discussion

267 We performed a large-scale, *in silico* study of predicted gene expression across a comprehensive set of  
268 human tissues to prioritize genes that alter the risk of T2D through regulation of gene expression levels.  
269 We corroborated many of the known T2D genes, which supports the role of regulation of gene expression  
270 levels as a key mediating mechanism, but also found novel genes both in known loci as well as in completely  
271 novel loci. Replication in an independent cohort gives further support to our results.

272 Among novel genes of interest are genes previously linked to related traits such as *HKDC1* (pregnancy-  
273 related glycemic traits) and *GPAM* (LDL cholesterol). Moreover, pathogenic variants in *KCNK17* -  
274 a novel T2D gene implicated by MetaXcan - have been identified in patients with hyperinsulinemic  
275 hypoglycemia and cardiac arrhythmia [28]. Another example, *SOX4*, has been implicated with diabetes  
276 in multiple experiments. The expression of *SOX4*/*Sox4b* has been shown to play a role in pancreas  
277 development and insulin secretion in mouse models and human cell lines [29, 30, 31]. For example, mice  
278 expressing a mutant form of *Sox4* exhibited a 40% reduction in glucose-induced insulin secretion [32].  
279 Moreover, overexpression of *SOX4* in a human insulin-secreting cell line (Endo-C- $\beta$ H2) resulted in a  
280 marked decrease in insulin release through up-regulation of *STXBP6* - a gene encoding an exocytosis-  
281 regulating protein [32].

282 Averaging across the genome, we found that diabetes relevant tissues such as liver, pancreas, adipose,  
283 and muscle are enriched with significant associations. However, when we look into individual genes  
284 at the top significance level we found associations in tissues that are not typically linked to diabetes.  
285 For example, *TCF7L2* was significantly associated only in aortic artery and adrenal gland, which is a  
286 consequence of the fact that with GTEx samples active regulation of this gene was only found in these  
287 tissues.

288 Most associations were discovered in a few tissues indicating strong context specificity. Some of the  
289 associations may be pointing to a real causal tissue but others are likely to be a consequence of shared  
290 regulation across tissues. Although the context specificity limits our ability to detect associations even  
291 in causal tissues, the sharing of the regulation across multiple tissues opens additional opportunities for  
292 discovering the disease-causing regulatory mechanism albeit in non-causal tissues where the environmental  
293 conditions were met. Our results underscore the benefits of an agnostic scanning across all available tissue  
294 models.

295 An important caveat of this study is that we used average expression over a gene when generating  
296 predictive models and may therefore miss the consequences of regulatory variants that impact splicing  
297 at T2D loci. Although it should not create false positives, this may explain why we failed to detect  
298 genome-wide significant associations at some regions encompassing putative T2D genes.

299 The predictive models employed in this study were trained from local variants within 1 Mb of each  
300 gene. Although most eQTLs mapped in human tissues are local eQTLs, this is influenced by the fact  
301 that the greater number of genetic variants, smaller haplotype structure, and relative smaller sample sizes  
302 associated with human studies considerably reduces power to detect distal eQTLs that regulate target  
303 genes through a non allele-specific mechanism (i.e. *trans* eQTLs) [7]. However, distal-acting eQTLs  
304 mapped in pancreatic islet and insulin-responsive peripheral tissues may account for some of the genetic  
305 architecture of T2D [33, 16].

306 In our study, we applied MetaXcan to explicitly integrate regulatory genetic information to improve  
307 disease gene mapping and overcome key limitations of GWAS and differential gene expression studies [21].  
308 This approach, along with similar approaches adopted by Gusev *et al.*(2015) and Zhu *et al.*(2016), directly  
309 addresses the importance of eQTLs in complex human traits and advances genetic studies beyond GWAS  
310 [34, 35]. Importantly, we provide information about the direction of gene expression that associates with  
311 disease, that was predominantly consistent across the most significant associations discovered in this study  
312 and replicated in an independent cohort. This immediately suggests potential therapeutic targets where  
313 the increased expression of genes - many of which were not previously reported from GWAS - significantly  
314 relates to increased disease risk. Moreover, these results establish a basis for subsequent experiments (e.g.  
315 gene editing) to interrogate the cellular and physiological consequences of dysregulation of novel candidate  
316 genes. Therefore, this investigation represents an important step forward in elucidating the genetic basis  
317 of T2D and other complex diseases.

## 318 **Materials and Methods**

319 No identifiable data were used for this study, which was considered to be “Non human subject research”.

## 320 **Determining SNP predictors of gene expression**

321 **DGN whole blood model.** SNP predictors of gene expression in whole blood tissue were determined  
322 as described in [36] with genome-wide genotype and RNA-seq data from the Depression Genes and  
323 Networks (DGN) cohort study [10] corresponding to 922 unrelated individuals ( $\hat{\pi} < 0.05$ ) of European  
324 ancestry. In brief, imputation of 650K SNPs with minor allele frequency (MAF)  $> 0.05$  and non-significant  
325 departure from Hardy-Weinberg equilibrium (HWE) were imputed to a 1000 Genomes (Phase 1, version  
326 3) reference panel [37] with ShapeIt2 [38]. The full set of  $\sim 1.9$  M imputed SNPs with MAF  $> 0.05$  and  
327 imputation  $R^2 > 0.8$  were subsetted to SNPs included in HapMap Phase II [39]. HCP (hidden covariates  
328 with prior) normalized gene-level expression data was downloaded from the NIMH repository [36].

329 **GTEEx tissue models.** RNA-seq gene expression from 8,555 tissue samples (representing 53 unique  
330 tissue types) from 544 subjects and imputed genotypes (available for 450 subjects and imputed to a  
331 1000 Genomes reference panel) was obtained from the Genotype Tissue Expression Project (GTEEx) data  
332 release on 2014-06-13 [9]. Expression measures from the top 44 GTEEx tissues with the largest available  
333 sample sizes [9, 36] and SNPs included in HapMap Phase II ( $\sim 2.6$  M) were carried forward in our model  
334 fitting procedure.

335 In order to delineate a set of informative SNPs for predicting tissue-level gene expression, we performed  
336 penalized regression with the Elastic Net - a multivariate linear model that includes the  $l_2$ -norm and  $l_1$ -  
337 norm penalties from ridge regression and the Least Absolute Shrinkage and Selection Operator (LASSO)  
338 procedure, respectively [40, 41]. This method leverages shrinkage parameters that enable feature selection  
339 while solving for the coefficient solutions to the regression of gene expression on SNP genotypes. The  
340 Elastic Net model includes an additional mixing parameter  $\alpha$  that determines the contribution from each  
341 penalty parameter (i.e. the Elastic Net model is equivalent to ridge regression and LASSO regression  
342 when  $\alpha = 0$  and  $\alpha = 1$ , respectively) [41]. Here, we set  $\alpha = 0.5$ . Gene expression - as measured by reads  
343 per kilobase of transcript per million reads mapped (RPKM) - was adjusted for potential batch effects  
344 and unmeasured confounders by regressing out the first 15 PEER factors [42] in R [43]. For each gene  
345 expressed in a tissue, model fitting was performed by regressing PEER-adjusted gene expression on the  
346 set of SNPs located within 1 Mb of the transcription start site (TSS). Therefore, subsequent analyses  
347 pertain to estimates of genetic components of gene expression attributable to local regulatory variants.  
348 The SNP coefficients from this procedure are used as weights to estimate the genetic component of gene

349 expression and are publicly available (<http://predictdb.org>).

## 350 **Summary data from GWAS on type 2 diabetes**

351 **Trans-ethnic Study summary data.** Input GWAS summary data used in our MetaXcan-based as-  
352 sociation of predicted gene expression and T2D corresponded to the trans-ethnic meta-analysis study  
353 [4] and was publicly available and downloaded from the DIAGRAM Consortium website ([http://](http://diagram-consortium.org/)  
354 [diagram-consortium.org/](http://diagram-consortium.org/)). This study involved a meta-analysis of 26,488 cases and 83,964 controls  
355 subjects from populations of European, east Asian, south Asian, and Mexican, and Mexican American  
356 ancestry. Although a majority of individuals were of European ancestry (12,171 cases and 56,862 con-  
357 trols) [44], the study included East Asian individuals from the AGEN-T2D Consortium (6,952 cases  
358 and 11,865 controls) [45], south Asian individuals from the SAT2D Consortium (5,561 cases and 14,458  
359 controls) [46], and individuals of Mexican and Mexican American ancestry (1,804 cases and 779 controls)  
360 [47]. SNPs were lifted to NCBI build GRCh37 (UCSC hg19 assembly).

361 **GWAS on T2D results from GERA study.** Replication analyses were performed using summary  
362 GWAS data from an analysis on the Genetic Epidemiology on Adult Health and Aging (GERA) cohort  
363 (dbGaP phs000674.p1). GERA represents a large, multi-ethnic cohort of individuals of European, East  
364 Asian, African American, and Latino ancestry where each subgroup was genome-wide genotyped with  
365 arrays designed to maximize coverage of common and low-frequency variants in each constituent pop-  
366 ulation [48, 49]. T2D case status was determined from ICD-9 codes available from electronic medical  
367 health records. SNPs meeting selection criteria for MAF ( $\geq 1\%$ ), HWE departure ( $p > 10^{-6}$ ), and call  
368 rate ( $> 95\%$ ) were pre-phased with SHAPEITv2.5 [38] and imputed to a 1000 Genomes reference panel  
369 with IMPUTEv2.3 [50]. GWAS on T2D was performed on a set of 71,604 unrelated ( $\hat{\pi} < 0.2$ ) subjects  
370 (9,747 cases and 61,857 controls) with SNPTESTv2.5 [51] and adjusted for principal components (PCs)  
371 to correct for population stratification.

372 **Gaussian Z-score imputation of GWAS summary statistics.** There was a total of 1,803,748  
373 SNPs in the gene expression prediction models across all 44 tissue models (including whole blood from  
374 the DGN study) that resulted from our Elastic Net fitting procedure ( $\alpha = 0.5$ ) and corresponded to genes  
375 with prediction FDR  $< 0.05$ . However, not all of these SNPs were present in the summary data from

376 the trans-ethnic and GERA meta-analysis of GWAS - the coverage of model SNPs in these datasets  
377 was 93.4% and 71.3%, respectively. In order to improve coverage of *model* SNPs to further enable  
378 comparisons between these summary datasets in replication and meta-analyses of MetaXcan results, we  
379 applied Gaussian Z-score imputation of GWAS summary statistics as implemented in Imp-G Summary  
380 software (<http://bogdan.bioinformatics.ucla.edu/software/>) [52]. We imputed GWAS Z-scores to  
381 a reference panel of all available ancestral populations from the 1000 Genomes Project phase 1 (v3)  
382 release [37]. The requisite haplotype files in Beagle [53] format were accessed from [http://bochet.gcc.biostat.washington.edu/beagle/1000\\_Genomes.phase1\\_release\\_v3/](http://bochet.gcc.biostat.washington.edu/beagle/1000_Genomes.phase1_release_v3/) on August 1, 2016. We  
383 restricted imputed *model* SNPs to those with imputation quality score ( $R^2$ -pred)  $\geq 0.80$  [52]. This  
384 increased coverage of *model* SNPs in the trans-ethnic and GERA GWAS summary datasets to 96.1% and  
385 91.6%, respectively.

## 387 **Testing for association between predicted gene expression and T2D with MetaX-** 388 **can**

389 For this study, we used MetaXcan [22], an extension of the PrediXcan method [21], that takes as input  
390 summary statistics from GWAS. This approach improves computational efficiency over PrediXcan as it  
391 does not require individual-level genotype data to estimate genetic components of gene expression for  
392 subsequent trait association testing. Rather, the PrediXcan Z-statistic ( $Z_g$ ) is approximated by:

$$Z_g \approx \sum_{l \in \text{Model}_g} w_{l,g} \frac{\sigma_l}{\hat{\sigma}_g} \frac{\hat{\beta}_l}{\text{se}(\hat{\beta}_l)} \quad (1)$$

393 where  $w_{l,g}$  represents the prediction model weight for SNP  $l$  on gene  $g$ ,  $\sigma_l$  is the standard deviation for  
394 SNP  $l$ ,  $\hat{\sigma}_g$  is the standard deviation of predicted expression for gene  $g$ ,  $\hat{\beta}_l$  is the regression coefficient for  
395 the regression of expression on the allelic dosage of SNP  $l$ .

396 In our MetaXcan analyses of T2D, we use regression coefficients ( $\hat{\beta}_l$ ) from results from the trans-ethnic  
397 meta-analysis of GWAS and the GWAS on T2D from the GERA study. Values for  $w_{l,g}$  were generated  
398 as described above and available from the PredictDB website (<http://predictdb.org>).  $\hat{\sigma}_g^2$  is estimated

399 as:

$$\begin{aligned}\hat{\sigma}_g^2 &= \text{Var}\left(\sum_{l \in \text{Model}_g} w_{l,g} \mathbf{X}_l\right) \\ &= \text{Var}(\mathbf{W}_g \mathbf{X}_g)\end{aligned}\tag{2}$$

400 Where  $\mathbf{W}_g$  is the vector of  $w_{l,g}$  for SNPs in the model of  $g$  and  $\text{Var}(\mathbf{X}_g)$  is the covariance matrix of  
401  $\mathbf{X}_g$ . We use SNP information from a 1000 Genome Project reference panel (European ancestry) to the  
402 compute the variances and covariances of the SNPs used to predict gene expression.

### 403 Locus analysis of T2D-associated regions

404 We first identified a set of 111 reported T2D genes based on their being the most proximal to T2D-  
405 associated SNPs at  $p < 5 \times 10^{-6}$  in the trans-ethnic meta-analysis of GWAS. We then delineated genomic  
406 regions for each reported gene by taking the set of all significantly-associated SNPs annotated to that  
407 gene and demarcating a window bounded by the SNPs most distal to each other. We then expanded the  
408 region by 1 Mb upstream and downstream of the “boundary” SNPs. This ensured that the reported gene  
409 was included within the genomic window corresponding to the T2D-associated locus. This procedure  
410 resulted in 68 non-overlapping genomic regions (i.e. windows).

411 We then performed a genome-wide MetaXcan analysis of the trans-ethnic study to test for association  
412 between predicted expression for each gene with prediction  $\text{FDR} \leq 0.05$  (from the regression of observed  
413 gene expression on predicted gene expression) in each of the 44 tissue models described above. When  
414 visualizing the MetaXcan results at each T2D locus we considered two significance thresholds: (1) genome-  
415 wide significance correcting for the total number of tests performed across all available tissue models and  
416 (2) significance correcting for the number of tests performed within each non-overlapping region.

## 417 **Meta-analysis of association results from the MetaXcan analysis of trans-** 418 **ethnic and GERA cohorts**

419 We performed a sample-sized based meta-analysis [54] of the association results from our MetaXcan  
420 analyses of the trans-ethnic and GERA studies where the Z-score ( $Z$ ) was given by:

$$Z = \frac{\sum_i Z_i w_i}{\sqrt{\sum_i w_i^2}} \quad (3)$$

421 where  $Z_i = \Phi^{-1}(P_i/2) * \text{sign}(\Delta_i)$ ,  $P_i$  is the p-value for study  $i$ ,  $w_i = \sqrt{N_i}$ ,  $N_i$  refers to the sample size  
422 for study  $i$ ,  $\Delta_i$  is the direction of effect in study  $i$ , and the overall P-value is given by:

$$P = 2\Phi(|-Z|) \quad (4)$$

## 423 **Gene set enrichment analysis of MetaXcan-significant gene sets**

424 **Gene set enrichment analysis.** Gene set enrichment analyses (GSEAs) were performed by comparing  
425 sets of significant genes implicated by our MetaXcan analyses with the complement set of GENCODE  
426 v18 [55] genes (~18K) for which we can predict in any tissue model with prediction FDR  $\leq 0.05$ . We  
427 restricted analyses to test for enrichment of pathways designated as Gene Ontology Biological Process  
428 (GO:BP) [56]. Overrepresented p-values were obtained from a parametric Fishers exact test using the  
429 Wallenius approximation and a non-central hypergeometric distribution [57]. GSEA was performed with  
430 the **G0seq** package [57] in R [43] that applies a weighting scheme to control for selection bias introduced  
431 by differences in transcript length.

## 432 **Cross-phenotype comparison of T2D gene enrichment**

433 The full set of annotated single variant results from published GWAS listed on the National Human  
434 Genome Research Institute / European Bioinformatics Institute (NHGRI-EBI) online catalogue - corre-  
435 sponding to 1,362 phenotypes - was downloaded from <https://www.ebi.ac.uk/gwas/> (Accessed April  
436 2016). The set of reported genes for each trait was tested for enrichment of genes significantly associated  
437 with T2D in our MetaXcan analyses through a resampling procedure. An empirical p-value was deter-  
438 mined by first taking the observed count of intersecting genes between reported genes for each trait and



439 MetaXcan-significant T2D genes. We then generated a null distribution of counts by randomly sampling  
440 10,000 gene sets from the set of all GENCODE v18 [55] with prediction FDR  $\leq 0.05$  in at least one tissue  
441 model. Each sample was matched for the number putative genes reported for each trait and the overlap  
442 with the set of MetaXcan-significant genes was recorded. The enrichment p-value was calculated as the  
443 number of instances a sampled count value equaled or exceeded the observed count between reported  
444 trait genes and MetaXcan-significant genes.

## 445 Acknowledgments

446 This project was funded in part by the Genotype-Tissue Expression project (GTEx) (R01 MH101820 and  
447 R01 MH090937), JMT (F31 DK 101202), HKI (R01 MH107666), and the University of Chicago Diabetes  
448 Research and Training Center (P30 DK020595). Andrew P Morris is a Wellcome Trust Senior Fellow in  
449 Basic Biomedical Science under award WT098017.

## 450 Data Access

451 **Trans-ethnic Type 2 Diabetes Study dataset** We downloaded trans-ethnic SNP level meta analysis  
452 results from <http://diagram-consortium.org>

453 **GERA dataset: dbGaP accession phs000674.v2.p2.**

454 Data came from a grant, the Resource for Genetic Epidemiology Research in Adult Health and Aging  
455 (RC2 AG033067; Schaefer and Risch, PIs) awarded to the Kaiser Permanente Research Program on  
456 Genes, Environment, and Health (RPGEH) and the UCSF Institute for Human Genetics. The RPGEH  
457 was supported by grants from the Robert Wood Johnson Foundation, the Wayne and Gladys Valley  
458 Foundation, the Ellison Medical Foundation, Kaiser Permanente Northern California, and the Kaiser  
459 Permanente National and Northern California Community Benefit Programs. The RPGEH and the  
460 Resource for Genetic Epidemiology Research in Adult Health and Aging are described in the following  
461 publication, Schaefer C, et al., The Kaiser Permanente Research Program on Genes, Environment and  
462 Health: Development of a Research Resource in a Multi-Ethnic Health Plan with Electronic Medical  
463 Records, In preparation, 2013.

## 464 Software and code

465 All code available in

466 <https://github.com/hakyimlab/MetaXcan> and

467 <https://github.com/hakyimlab/MetaXcanT2D>

## 468 References

- 469 [1] DeFronzo RA. From the Triumvirate to the Ominous Octet: A New Paradigm for the Treatment of  
470 Type 2 Diabetes Mellitus. *Diabetes Care*. 2009;58(4):773–795.
- 471 [2] Billings LK, Florez JC. The genetics of type 2 diabetes: what have we learned from GWAS? *Annals*  
472 *of the New York Academy of Sciences*. 2010;1212:59–77.
- 473 [3] Voight BFB, Scott LJJ, Steinthorsdottir V, Andrew P, Aulchenko YYS, Thorleifsson G, et al. Twelve  
474 type 2 diabetes susceptibility loci identified through large-scale association analysis. *Nature Genetics*.  
475 2010;42(7):579–89.
- 476 [4] Replication DG, Consortium MaD, Epidemiology AG. Genome-wide trans-ancestry meta-analysis  
477 provides insight into the genetic architecture of type 2 diabetes susceptibility. *Nature genetics*.  
478 2014;46(3):234–44. Available from: <http://www.ncbi.nlm.nih.gov/pubmed/24509480>.
- 479 [5] Hindorff LA, Sethupathy P, Junkins HA, Ramos EM, Mehta JP, Collins FS, et al. Potential eti-  
480 ologic and functional implications of genome-wide association loci for human diseases and traits.  
481 *Proceedings of the National Academy of Sciences*. 2009 jun;106(23):9362–9367. Available from:  
482 <http://www.pnas.org/content/106/23/9362.abstract>.
- 483 [6] Visscher PM, Brown MA, McCarthy MI, Yang J. Five years of GWAS discovery; 2012.
- 484 [7] Albert FW, Kruglyak L. The role of regulatory variation in complex traits and disease. *Nat Rev*  
485 *Genet*. 2015 apr;16(4):197–212. Available from: <http://dx.doi.org/10.1038/nrg389110.1038/nrg3891>.
- 486
- 487 [8] Lonsdale J, Thomas J, Salvatore M, Phillips R, Lo E, Shad S, et al. The Genotype-Tissue Ex-  
488 pression (GTEx) project. *Nat Genet*. 2013 jun;45(6):580–585. Available from: <http://www.ncbi>.

- 489 [nlm.nih.gov/pubmed/23715323](http://www.ncbi.nlm.nih.gov/pubmed/23715323)<http://dx.doi.org/10.1038/ng.2653><http://www.nature.com/ng/journal/v45/n6/abs/ng.2653.html#supplementary-information>.
- 490
- 491 [9] The GTEx Consortium. The Genotype-Tissue Expression (GTEx) pilot analysis: Multitissue gene  
492 regulation in humans. *Science*. 2015;348:648–660. Available from: [http://www.ncbi.nlm.nih.gov/  
493 pubmed/25954001](http://www.ncbi.nlm.nih.gov/pubmed/25954001).
- 494 [10] Battle A, Mostafavi S, Zhu X, Potash JB, Weissman MM, McCormick C, et al. Characterizing  
495 the genetic basis of transcriptome diversity through RNA-sequencing of 922 individuals. *Genome  
496 Research*. 2014 jan;24(1):14–24. Available from: [http://www.ncbi.nlm.nih.gov/pmc/articles/  
497 PMC3875855/](http://www.ncbi.nlm.nih.gov/pmc/articles/PMC3875855/).
- 498 [11] Nicolae DL, Gamazon E, Zhang W, Duan S, Eileen Dolan M, Cox NJ, et al. Trait-associated  
499 SNPs are more likely to be eQTLs: annotation to enhance discovery from GWAS. *PLoS genetics*.  
500 2010;6(4):e1000888.
- 501 [12] Maurano MT, Humbert R, Rynes E, Thurman RE, Haugen E, Wang H, et al. Systematic Localiza-  
502 tion of Common Disease-Associated Variation in Regulatory DNA. *Science*. 2012;337(6099):1190–  
503 1195. Available from: [http://www.pubmedcentral.nih.gov/articlerender.fcgi?artid=  
504 3771521&tool=pmcentrez&rendertype=abstract](http://www.pubmedcentral.nih.gov/articlerender.fcgi?artid=3771521&tool=pmcentrez&rendertype=abstract).
- 505 [13] Degner JF, Pai AA, Pique-Regi R, Veyrieras JB, Gaffney DJ, Pickrell JK, et al. DNase  
506 I sensitivity QTLs are a major determinant of human expression variation. *Nature*.  
507 2012;482(7385):390–394. Available from: [http://www.pubmedcentral.nih.gov/articlerender.  
508 fcgi?artid=3501342&tool=pmcentrez&rendertype=abstract](http://www.pubmedcentral.nih.gov/articlerender.fcgi?artid=3501342&tool=pmcentrez&rendertype=abstract).
- 509 [14] Jian Yang Michael E Goddard, Peter M Visscher, et al BB. Common SNPs explain a large portion  
510 of the heritability for human height. *Nature Genetics*. 2010;42:565–569.
- 511 [15] Gusev A, Lee SH, Trynka G, Finucane H, Vilhj??lmsson BJ, Xu H, et al. Partitioning heritability of  
512 regulatory and cell-type-specific variants across 11 common diseases. *American Journal of Human  
513 Genetics*. 2014;95(5):535–552.

- 514 [16] Torres JM, Gamazon ER, Parra EJ, Below JE, Valladares-Salgado A, Wachter N, et al. Cross-tissue  
515 and tissue-specific eQTLs: Partitioning the heritability of a complex trait. *American Journal of*  
516 *Human Genetics*. 2014;95(5):521–534.
- 517 [17] Musunuru K, Strong A, Frank-Kamenetsky M, Lee NE, Ahfeldt T, Sachs KV, et al. From noncoding  
518 variant to phenotype via SORT1 at the 1p13 cholesterol locus. *Nature*. 2010 aug;466(7307):714–  
519 719. Available from: <http://dx.doi.org/10.1038/nature09266><http://www.nature.com/nature/journal/v466/n7307/abs/nature09266.html#supplementary-information>.
- 521 [18] Smemo S, Tena JJ, Kim KH, Gamazon ER, Sakabe NJ, Gómez-Marín C, et al. Obesity-  
522 associated variants within FTO form long-range functional connections with IRX3. *Nature*. 2014  
523 mar;advance on(7492):371–5. Available from: <http://dx.doi.org/10.1038/nature13138><http://www.nature.com/nature/journal/vaop/ncurrent/abs/nature13138.html#supplementary-information><http://www.pubmedcentral.nih.gov/articlerender.fcgi?artid=4113484&tool=pmcentrez&rendertype=abstract>.
- 527 [19] Doyle A, McGarry MP, Lee NA, Lee JJ. The construction of transgenic and gene knockout/knockin  
528 mouse models of human disease. *Transgenic Research*. 2011;21(2):327–349. Available from: <http://dx.doi.org/10.1007/s11248-011-9537-3>.
- 530 [20] Leung RKM, Whittaker PA. RNA interference: From gene silencing to gene-specific therapeu-  
531 tics. *Pharmacology & Therapeutics*. 2005 aug;107(2):222–239. Available from: <http://www.sciencedirect.com/science/article/pii/S0163725805000628>.
- 533 [21] Gamazon ER, Wheeler HE, Shah KP, Mozaffari SV, Aquino-Michaels K, Carroll RJ, et al. A gene-  
534 based association method for mapping traits using reference transcriptome data. *Nature genetics*.  
535 2015;47(9):1091–1098. Available from: <http://dx.doi.org/10.1038/ng.3367>.
- 536 [22] Barbeira A, Shah KP, Torres JM, Wheeler HE, Torstenson ES, Edwards T, et al. MetaXcan: Sum-  
537 mary Statistics Based Gene-Level Association Method Infers Accurate PrediXcan Results. *bioRxiv*.  
538 2016 mar; Available from: <http://biorxiv.org/content/early/2016/03/23/045260.abstract>.
- 539 [23] Consortium DGR, analysis (DIAGRAM) M. Genome-wide trans-ancestry meta-analysis pro-  
540 vides insight into the genetic architecture of type 2 diabetes susceptibility. *Nature Genetics*.

- 541 2014;46(3):234–244. Available from: <http://www.nature.com/doi/10.1038/ng.2897>  
542 `\delimiter"026E30F$npapers3://publication/doi/10.1038/ng.2897`.
- 543 [24] Cook JP, Morris AP. Multi-ethnic genome-wide association study identifies novel locus for type 2  
544 diabetes susceptibility. *European Journal of Human Genetics*. 2016 Aug;24(8):1175–1180. Available  
545 from: <http://www.nature.com/doi/10.1038/ejhg.2016.17>.
- 546 [25] Gloyn AL, Pearson ER, Antcliff JF, Proks P, Bruining GJ, Slingerland AS, et al. Activating Muta-  
547 tions in the Gene Encoding the ATP-Sensitive Potassium-Channel Subunit Kir6.2 and Permanent  
548 Neonatal Diabetes. *New England Journal of Medicine*. 2004;350(18):1838–1849. PMID: 15115830.  
549 Available from: <http://dx.doi.org/10.1056/NEJMoa032922>.
- 550 [26] Fuchsberger C, Flannick J, Teslovich TM, Mahajan A, Agarwala V, Gaulton KJ, et al. The genetic  
551 architecture of type 2 diabetes. *Nature*. 2016 Jul;536(7614):41–47. Available from: <http://www.nature.com/doi/10.1038/nature18642>.  
552
- 553 [27] Flannick J, Johansson S, Njølstad PR. Common and rare forms of diabetes mellitus: towards  
554 a continuum of diabetes subtypes. Nature Publishing Group. 2016 Apr;p. 1–13. Available from:  
555 <http://dx.doi.org/10.1038/nrendo.2016.50>.
- 556 [28] Arya V. Understanding the novel genetic mechanisms of congenital hyperinsulinaemic hypogly-  
557 caemia. University College London. University College of London, Gower Street, London, WC1E  
558 6BT; 2015. [Http://discovery.ucl.ac.uk/id/eprint/1469326](http://discovery.ucl.ac.uk/id/eprint/1469326).
- 559 [29] Mavropoulos A, Devos N, Biemar F, Zecchin E, Argenton F, Edlund H, et al. sox4b is a key player of  
560 pancreatic cell differentiation in zebrafish. *Developmental Biology*. 2005;285(1):211 – 223. Available  
561 from: <http://www.sciencedirect.com/science/article/pii/S0012160605004124>.
- 562 [30] Wilson ME, Yang KY, Kalousova A, Lau J, Kosaka Y, Lynn FC, et al. The HMG Box Transcription  
563 Factor Sox4 Contributes to the Development of the Endocrine Pancreas. *Diabetes*. 2005;54(12):3402–  
564 3409. Available from: <http://diabetes.diabetesjournals.org/content/54/12/3402>.
- 565 [31] Goldsworthy M, Hugill A, Freeman H, Horner E, Shimomura K, Bogani D, et al. Role of  
566 the Transcription Factor Sox4 in Insulin Secretion and Impaired Glucose Tolerance. *Diabetes*.

567 2008;57(8):2234–2244. Available from: <http://diabetes.diabetesjournals.org/content/57/8/>  
568 2234.

569 [32] Collins SC, Do HW, Hastoy B, Hugill A, Adam J, Chibalina MV, et al. Increased Expression of  
570 the Diabetes Gene SOX4 Reduces Insulin Secretion by Impaired Fusion Pore Expansion. *Diabetes*.  
571 2016;65(7):1952–1961. Available from: <http://diabetes.diabetesjournals.org/content/65/7/>  
572 1952.

573 [33] Elbein SC, Gamazon ER, Das SK, Rasouli N, Kern PA, Cox NJ. Genetic risk factors for  
574 type 2 diabetes: a trans-regulatory genetic architecture? *American journal of human genet-*  
575 *ics*. 2012;91:466–77. Available from: [http://www.pubmedcentral.nih.gov/articlerender.fcgi?](http://www.pubmedcentral.nih.gov/articlerender.fcgi?artid=3512001&tool=pmcentrez&rendertype=abstract)  
576 [artid=3512001&tool=pmcentrez&rendertype=abstract](http://www.pubmedcentral.nih.gov/articlerender.fcgi?artid=3512001&tool=pmcentrez&rendertype=abstract).

577 [34] Gusev A, Ko A, Shi H, Bhatia G, Chung W, Penninx BWJ, et al. Integrative approaches for large-  
578 scale transcriptome-wide association studies. *bioRxiv*. 2015 aug; Available from: [http://biorxiv.](http://biorxiv.org/content/early/2015/08/10/024083.abstract)  
579 [org/content/early/2015/08/10/024083.abstract](http://biorxiv.org/content/early/2015/08/10/024083.abstract).

580 [35] Zhu Z, Zhang F, Hu H, Bakshi A, Robinson MR, Powell JE, et al. Integration of summary data  
581 from GWAS and eQTL studies predicts complex trait gene targets. *Nat Genet*. 2016 mar; advance  
582 on. Available from: <http://dx.doi.org/10.1038/ng.3538>[http://www.nature.](http://www.nature.com/ng/journal/vaop/ncurrent/abs/ng.3538.html#supplementary-information)  
583 [com/ng/journal/vaop/ncurrent/abs/ng.3538.html#supplementary-information](http://www.nature.com/ng/journal/vaop/ncurrent/abs/ng.3538.html#supplementary-information).

584 [36] Wheeler HE, Shah KP, Brenner J, Garcia T, Aquino-Michaels K, Cox NJ, et al. Survey of the Heri-  
585 tability and Sparsity of Gene Expression Traits Across Human Tissues. *bioRxiv*. 2016 mar; Available  
586 from: <http://biorxiv.org/content/early/2016/03/15/043653.1.abstract>.

587 [37] The 1000 Genomes Project Consortium. An integrated map of genetic variation from 1,092  
588 human genomes. *Nature*. 2012;491(7422):56–65. Available from: [http://www.pubmedcentral.](http://www.pubmedcentral.nih.gov/articlerender.fcgi?artid=3498066&tool=pmcentrez&rendertype=abstract&delimiter%20E30F$nhhttp://www.nature.com/nature/journal/v491/n7422/full/nature11632.html$delimiter%20E30F$nhhttp://www.nature.com/doi/finder/10.1038/nature11632)  
589 [nih.gov/articlerender.fcgi?artid=3498066&tool=pmcentrez&rendertype=abstract&](http://www.pubmedcentral.nih.gov/articlerender.fcgi?artid=3498066&tool=pmcentrez&rendertype=abstract&delimiter%20E30F$nhhttp://www.nature.com/nature/journal/v491/n7422/full/nature11632.html$delimiter%20E30F$nhhttp://www.nature.com/doi/finder/10.1038/nature11632)  
590 [delimiter"026E30F\\$nhhttp://www.nature.com/nature/journal/v491/n7422/full/](http://www.nature.com/nature/journal/v491/n7422/full/nature11632.html$delimiter%20E30F$nhhttp://www.nature.com/doi/finder/10.1038/nature11632)  
591 [nature11632.html\\$delimiter"026E30F\\$nhhttp://www.nature.com/doi/finder/10.1038/](http://www.nature.com/doi/finder/10.1038/nature11632)  
592 [nature11632](http://www.nature.com/doi/finder/10.1038/nature11632).

593 [38] Delaneau O, Marchini J, Zagury JF. A linear complexity phasing method for thousands of genomes.  
594 *Nature methods*. 2012;9(2):179–81. Available from: <http://dx.doi.org/10.1038/nmeth.1785>.

- 595 [39] International T, Consortium H. The International HapMap Project. *Nature*. 2003;426(6968):789–  
596 796.
- 597 [40] Tibshirani R. Regression Selection and Shrinkage via the Lasso. *Journal of the Royal Statistical So-*  
598 *ciety B*. 1994;58(1):267–288. Available from: [http://citeseer.ist.psu.edu/viewdoc/summary?](http://citeseer.ist.psu.edu/viewdoc/summary?doi=10.1.1.35.7574)  
599 [doi=10.1.1.35.7574](http://citeseer.ist.psu.edu/viewdoc/summary?doi=10.1.1.35.7574).
- 600 [41] Hastie TJ, Tibshirani RJ, Friedman JH. *The elements of statistical learning : data mining, inference,*  
601 *and prediction*. Springer series in statistics. New York: Springer; 2009. *Autres impressions : 2011*  
602 *(corr.), 2013 (7e corr.)*. Available from: <http://opac.inria.fr/record=b1127878>.
- 603 [42] Stegle O, Parts L, Piipari M, Winn J, Durbin R. Using probabilistic estimation of expression residu-  
604 als (PEER) to obtain increased power and interpretability of gene expression analyses. *Nature pro-*  
605 *tocols*. 2012;7(3):500–7. Available from: [http://www.pubmedcentral.nih.gov/articlerender.](http://www.pubmedcentral.nih.gov/articlerender.fcgi?artid=3398141&tool=pmcentrez&rendertype=abstract)  
606 [fcgi?artid=3398141&tool=pmcentrez&rendertype=abstract](http://www.pubmedcentral.nih.gov/articlerender.fcgi?artid=3398141&tool=pmcentrez&rendertype=abstract).
- 607 [43] R Development Core Team R. *R: A Language and Environment for Statistical Computing*. vol. 1;  
608 2011. Available from: <http://www.r-project.org>.
- 609 [44] Morris ADP, Voight BF, Teslovich TM, Ferreira T, Segre AV, Steinthorsdottir V, et al. Large-scale  
610 association analysis provides insights into the genetic architecture and pathophysiology of type 2  
611 diabetes. *Nature Genetics*. 2012;44(9):981–990. Available from: [http://www.ncbi.nlm.nih.gov/](http://www.ncbi.nlm.nih.gov/pubmed/22885922)  
612 [pubmed/22885922](http://www.ncbi.nlm.nih.gov/pubmed/22885922).
- 613 [45] Cho YS, Chen CH, Hu C, Long J, Hee Ong RT, Sim X, et al. Meta-analysis of genome-wide  
614 association studies identifies eight new loci for type 2 diabetes in east Asians. *Nature Genetics*.  
615 2011;44(1):67–72. Available from: <http://dx.doi.org/10.1038/ng.1019>.
- 616 [46] Kooner JS, Saleheen D, Sim X, Sehmi J, Zhang W, Frossard P, et al. Genome-wide association study  
617 in individuals of South Asian ancestry identifies six new type 2 diabetes susceptibility loci. *Nature*  
618 *Genetics*. 2011;43(10):984–989.
- 619 [47] Parra EJ, Below JE, Krithika S, Valladares A, Barta JL, Cox NJ, et al. Genome-wide association  
620 study of type 2 diabetes in a sample from Mexico City and a meta-analysis of a Mexican-American  
621 sample from Starr County, Texas. *Diabetologia*. 2011;54:2038–2046.

- 622 [48] Hoffmann TJ, Kvale MN, Hesselson SE, Zhan Y, Aquino C, Cao Y, et al. Next generation genome-  
623 wide association tool: Design and coverage of a high-throughput European-optimized SNP array.  
624 Genomics. 2011 aug;98(2):79–89. Available from: [http://www.ncbi.nlm.nih.gov/pmc/articles/](http://www.ncbi.nlm.nih.gov/pmc/articles/PMC3146553/)  
625 [PMC3146553/](http://www.ncbi.nlm.nih.gov/pmc/articles/PMC3146553/).
- 626 [49] Hoffmann TJ, Zhan Y, Kvale MN, Hesselson SE, Gollub J, Iribarren C, et al. Design and coverage of  
627 high throughput genotyping arrays optimized for individuals of East Asian, African American, and  
628 Latino race/ethnicity using imputation and a novel hybrid SNP selection algorithm. Genomics. 2011  
629 dec;98(6):422–430. Available from: <http://www.ncbi.nlm.nih.gov/pmc/articles/PMC3502750/>.
- 630 [50] Howie BN, Donnelly P, Marchini J. A flexible and accurate genotype imputation method for the  
631 next generation of genome-wide association studies. PLoS Genet. 2009;5:e1000529.
- 632 [51] Marchini J, Howie B, Myers S, McVean G, Donnelly P. A new multipoint method for genome-wide  
633 association studies by imputation of genotypes. Nature genetics. 2007;39(7):906–13.
- 634 [52] Pasaniuc B, Zaitlen N, Shi H, Bhatia G, Gusev A, Pickrell J, et al. Fast and accurate  
635 imputation of summary statistics enhances evidence of functional enrichment. Bioinformat-  
636 ics. 2014; Available from: [http://bioinformatics.oxfordjournals.org/content/early/2014/](http://bioinformatics.oxfordjournals.org/content/early/2014/07/18/bioinformatics.btu416.abstract)  
637 [07/18/bioinformatics.btu416.abstract](http://bioinformatics.oxfordjournals.org/content/early/2014/07/18/bioinformatics.btu416.abstract).
- 638 [53] Browning BL, Browning SR. Genotype Imputation with Millions of Reference Samples. The Amer-  
639 ican Journal of Human Genetics. 2016 oct;98(1):116–126. Available from: [http://dx.doi.org/10.](http://dx.doi.org/10.1016/j.ajhg.2015.11.020)  
640 [1016/j.ajhg.2015.11.020](http://dx.doi.org/10.1016/j.ajhg.2015.11.020).
- 641 [54] Willer CJ, Li Y, Abecasis GR. METAL: Fast and efficient meta-analysis of genomewide association  
642 scans. Bioinformatics. 2010;26(17):2190–2191.
- 643 [55] Harrow J, Frankish A, Gonzalez JM, Tapanari E, Diekhans M, Kokocinski F, et al. GENCODE: The  
644 reference human genome annotation for the ENCODE project. Genome Research. 2012;22(9):1760–  
645 1774.
- 646 [56] The Gene Ontology Consortium. Gene Ontology: tool for the unification of biology. Nature Genet-  
647 ics. 2000;25(may):25–29. Available from: [http://scholar.google.com/scholar?hl=en&btnG=](http://scholar.google.com/scholar?hl=en&btnG=Search&q=intitle:Gene+Ontology:+tool+for+the+unification+of+biology{#}0)  
648 [Search&q=intitle:Gene+Ontology:+tool+for+the+unification+of+biology{#}0](http://scholar.google.com/scholar?hl=en&btnG=Search&q=intitle:Gene+Ontology:+tool+for+the+unification+of+biology{#}0).



- 649 [57] Young MD, Wakefield MJ, Smyth GK, Oshlack A. Gene ontology analysis for RNA-seq: accounting  
650 for selection bias. *Genome biology*. 2010;11(2):R14.
